# Supplementary material for: Transcriptome Analysis of Sogatella furcifera (Homoptera: Delphacidae) in Response to Sulfoxaflor and Functional Verification of Resistance-Related P450 Genes
Source: Int J Mol Sci. 2019 Sep 15;20(18):4573. doi: 10.3390/ijms20184573 (PMC6770238; doi:10.3390/ijms20184573)
Supplement: Supplementary file 1 [file ijms-20-04573-s001.pdf]

**Supplementary Table 1.** Statistics of transcriptome data filtering in the six samples

| Sample   | Before Filter Reads Num          | After Filter clean Reads Num (%) | GC     | Adapter (%)    | Low quality (%) |
|----------|----------------------------------|----------------------------------|--------|----------------|-----------------|
| Sus-Lab1 | 50653904(Q20:97.98%, Q30:94.92%) | 49806332(Q20:98.72%, Q30:96.12%) | 45.71% | 203180 (0.4%)  | 641366 (1.27%)  |
| Sus-Lab2 | 55748732(Q20:97.91%, Q30:94.77%) | 54762862(Q20:98.69%, Q30:96.04%) | 46.42% | 232514 (0.42%) | 750092 (1.35%)  |
| Sus-Lab3 | 59092434(Q20:98.04%, Q30:95.07%) | 58128812(Q20:98.76%, Q30:96.23%) | 45.36% | 231182 (0.39%) | 729124 (1.23%)  |
| SF-Sel1  | 53682042(Q20:97.95%, Q30:94.86%) | 52776552(Q20:98.7%, Q30:96.07%)  | 45.55% | 200350 (0.37%) | 701990 (1.31%)  |
| SF-Sel2  | 56892728(Q20:97.93%, Q30:94.84%) | 55908308(Q20:98.7%, Q30:96.1%)   | 45.53% | 221788 (0.39%) | 759308 (1.33%)  |
| SF-Sel3  | 59049302(Q20:97.98%, Q30:94.97%) | 58066616(Q20:98.73%, Q30:96.19%) | 43.90% | 212374 (0.36%) | 766902 (1.3%)   |

Note: Reads Num (PE) = Reads1 Num + Reads2 Num (the reverse and forward total reads); the probability of error recognition of Q20 and Q30 were 1% and 0.1%, respectively.

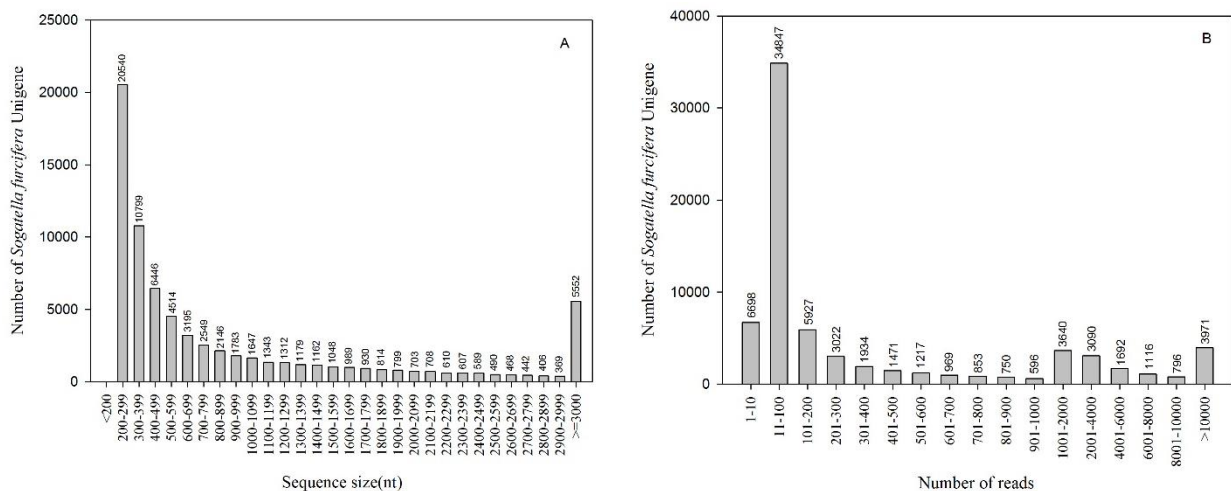

**Supplementary figure 1.** Length distribution of unigene in the transcriptome data of *S. furcifera* reads and coverage map of reads in unigene. (A) Distribution of unigenes in different length ranges (e.g., <200 represents 0–200). (B) Distribution of unigenes with different number of reads (e.g., 1-10 represents unigene consisted with 1-10 reads).

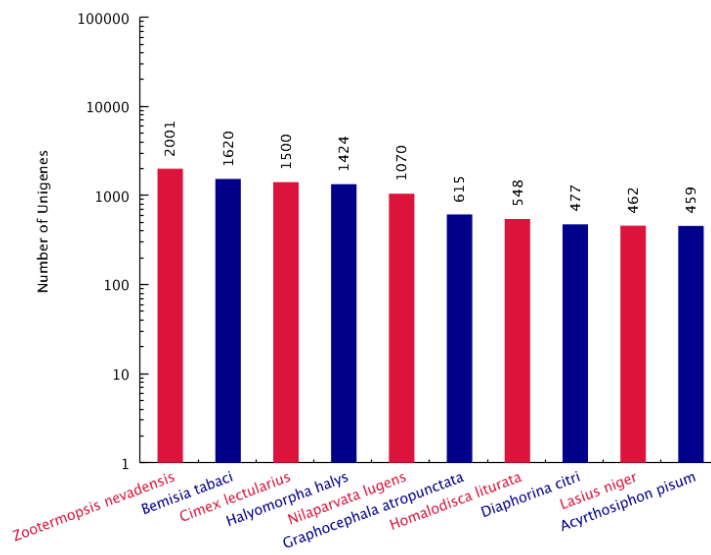

**Supplementary Figure 2A.** Species distribution of the BlastX matches to the unigenes on the Nr database (Top ten)

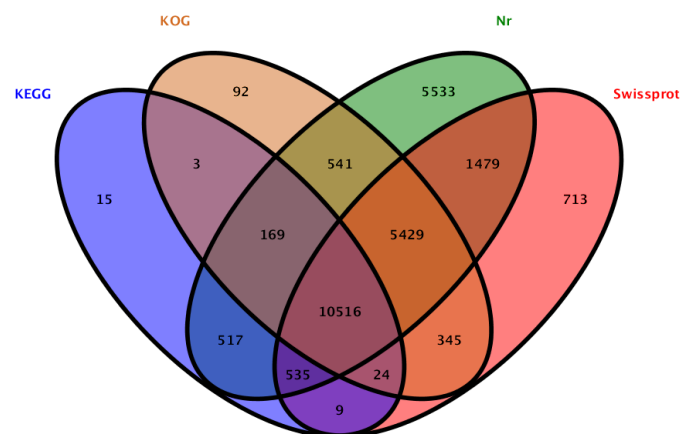

**Supplementary Figure 2B.** Venn Diagram of annotation genes of four database

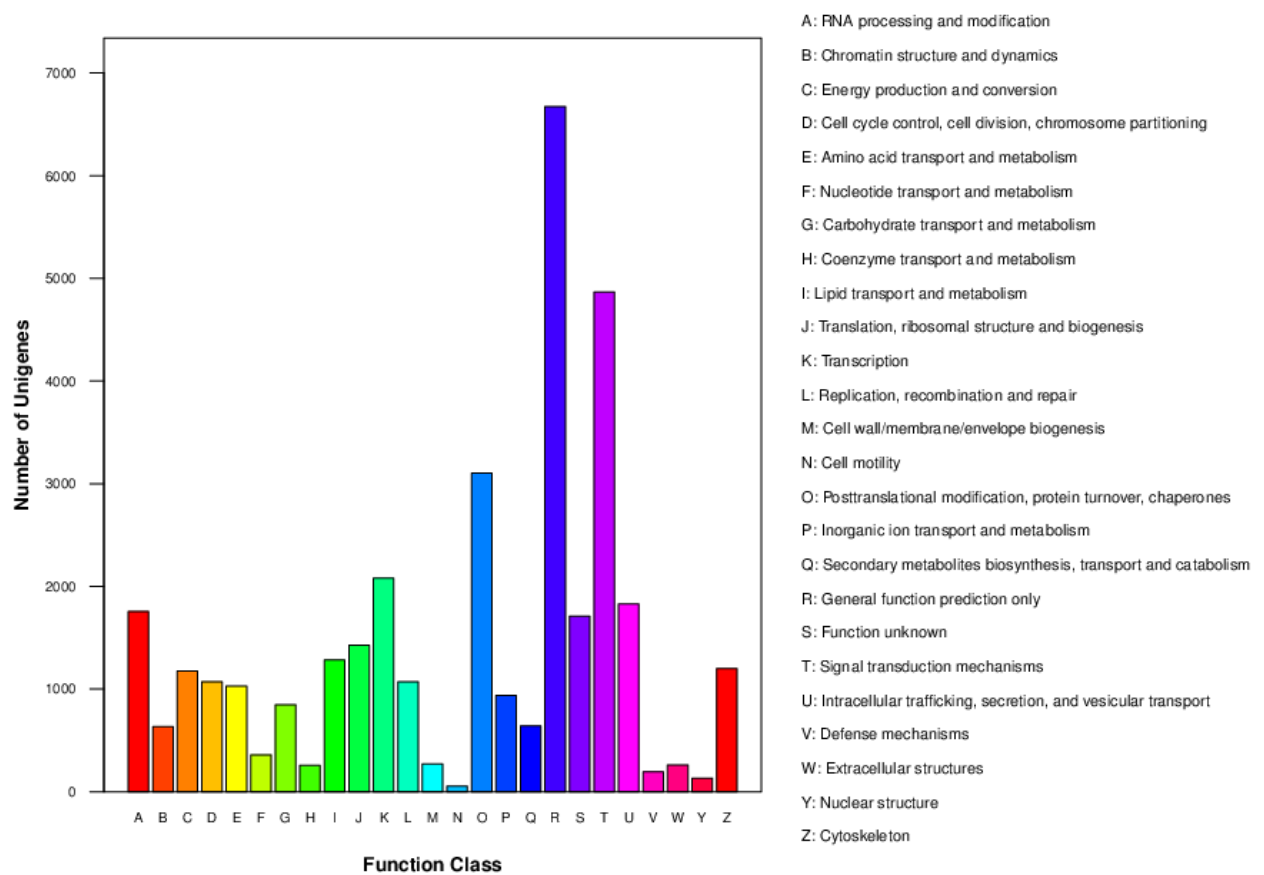

**Supplementary Figure 2C.** KOG function classification of *Sogatella furcifera*. All putative proteins were aligned to the KOG database and were classified functionally into at least 25 molecular families.

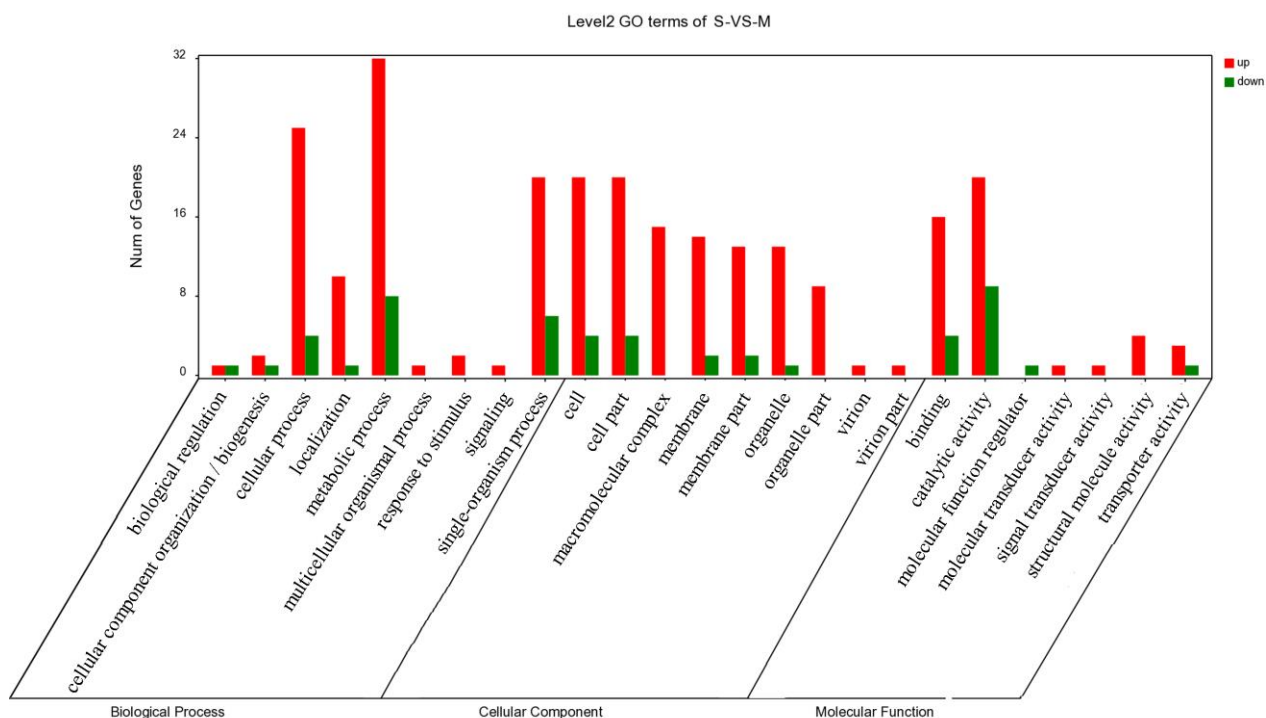

**Supplementary Figure 3.** GO categories of unigene on the different groups. The ordinate means GO terms, the abscissa means the number of DEGs of each GO term. Red color means the terms of up-regulated genes, green color means the terms of down regulated genes, respectively.

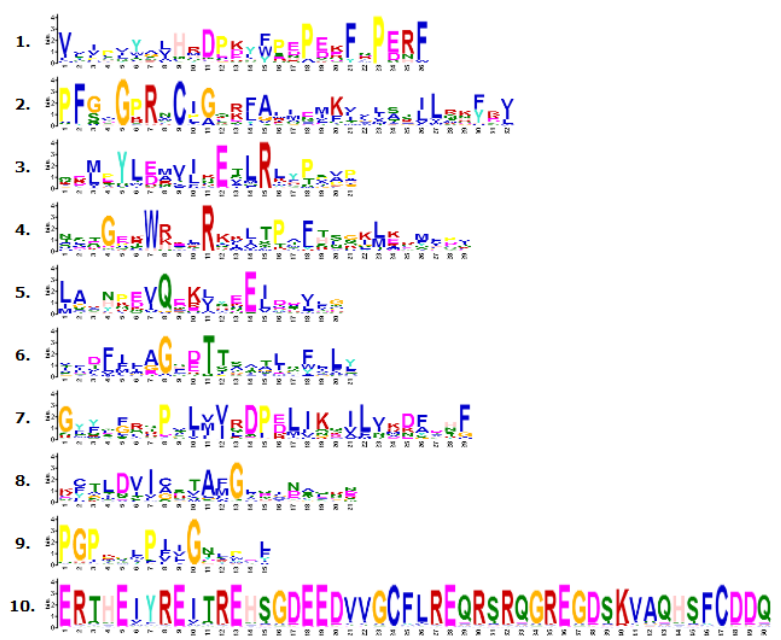

**Supplementary Figures 4** Conservative sequence display of different motif structures. The number of 1 to 10 stands for motif1 to motif10, and abscissa represents conserved amino acid sequences of different motifs.
